# Supplementary material
Source: Springer Nature journal article supplement (https://www.springermedizin.de/resource/supplementary/12891_2009_839_MOESM4_ESM.pdf/9507138)
Supplement: MOESM4 [file 9507138]

### **Inclusion**

All patients between 8 and 17 years, with adolescent idiopathic scoliosis (Cobb angle  $>10^\circ$ ) visiting the outpatient clinic of the UMCG.

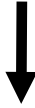

**Informed consent**

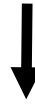

**Evaluation every 6 months**

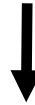

### **Exclusion**

- Previous spinal operation
- Skeletal dysplasia
- Abnormalities of maturation or height that would influence height measurements

### **Summary study protocol**

- Anamnesis
- Physical exam
  - Physical exam back
  - Length and weight measurements
  - Secondary sexual characteristics
- Total body X-ray
  - Spine: classification scoliosis, Cobb angle, length scoliotic spine
  - Pelvis: Triradiate cartilage, Risser sign
  - Hand: Tanner Whitehouse skeletal age
  - Elbow: Sauvegrain skeletal age
- EMG ratios paraspinal muscle activity
